# Supplementary material
Source: Springer Nature journal article supplement (https://www.springermedizin.de/resource/supplementary/12936_2009_985_MOESM1_ESM.pdf/9548716)
Supplement: MOESM1 [file 9548716]

Number of children screened (278)

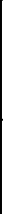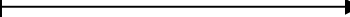

Excluded 36 children.  
18 with malaria  
5 with Hb < 5 g/dl  
13 were staying >20 Km

242 randomized

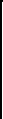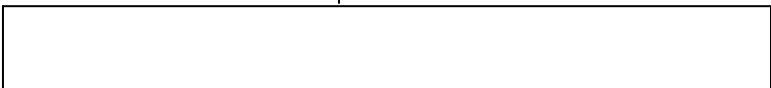

120  
Received SP

122  
Received chloquine

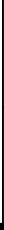

7 Lost to follow up  
5 -Relocated  
2- Had sick guardians

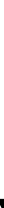

8 lost to follow up  
5 -Relocated  
3- At boarding school

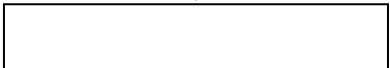

No Malaria (86%)  
103

Malaria (14%)  
17

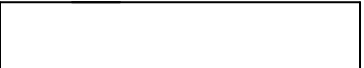

No Malaria (75.4%)  
92

Malaria (24.6%)  
30
